# Supplementary material
Source: Springer Nature journal article supplement (https://www.springermedizin.de/resource/supplementary/12965_2006_38_MOESM7_ESM.pdf/9572986)

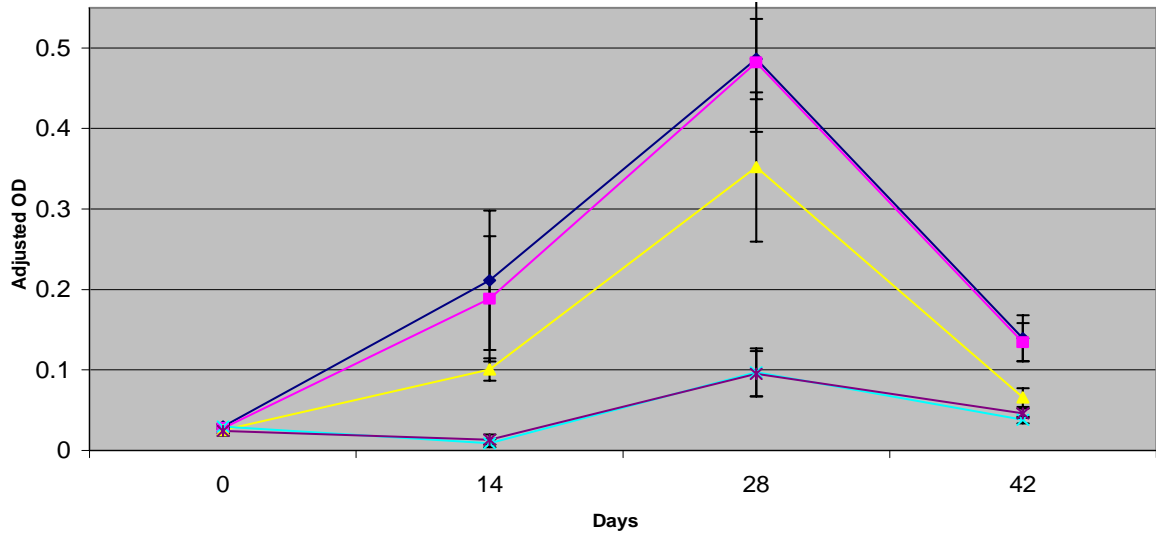

◆ pVAX1/VP1-S    ■ pVAX1/VP1-4    ▲ pEGFPN1/VP1    × pVAX1    \* PBS

Supplement: MOESM7 [file 9572986]
